# Supplementary material
Source: PubMed Central journal article supplement (PMC11558313)
Supplement: ijcep0017-0346-f7.pdf [file ijcep0017-0346-f7.pdf]

## ERG expression before and after bevacizumab therapy

**Supplementary Table 1. Naïve-refractory Bev group**

| Case | Age | Sex | Location     | PFS (days) | OS (days) | Refractory sample | Initial surgery |           | Refractory sample |           |
|------|-----|-----|--------------|------------|-----------|-------------------|-----------------|-----------|-------------------|-----------|
|      |     |     |              |            |           |                   | Vessel density  | ERG score | Vessel density    | ERG score |
| 1    | 65  | M   | Rt. Parietal | 224        | 957       | Salvage surgery   | 65.2            | 45        | 43                | 45        |
| 2    | 48  | F   | Rt. Frontal  | 224        | 911       | Salvage surgery   | 52.8            | 39        | 25.4              | 42        |
| 3    | 50  | F   | Lt. Frontal  | 132        | 571       | Salvage surgery   | 41.6            | 45        | 87                | 30        |
| 4    | 52  | F   | Lt. Temporal | 195        | 2464      | Autopsy           | 210             | 45        | 73.2              | 11        |
| 5    | 73  | M   | Lt. Temporal | 287        | 554       | Autopsy           | 137.4           | 45        | 81.6              | 2         |
| 6    | 52  | M   | Lt. Temporal | 294        | 699       | Autopsy           | 323.6           | 42        | 70.6              | 0         |
| 7    | 41  | M   | Cerebellar   | 433        | 1239      | Salvage surgery   | 23.8            | 45        | 42.6              | 33        |
| 8    | 56  | M   | Lt. Temporal | 140        | 932       | Salvage surgery   | 162.2           | 33        | 50.4              | 29        |
| 9    | 65  | F   | Rt. Parietal | 308        | 506       | Autopsy           | 144.8           | 29        | 74.6              | 5         |
| 10   | 54  | M   | Lt. Temporal | 189        | 329       | Autopsy           | 207.2           | 42        | 67.2              | 0         |
| 11   | 51  | M   | Lt. Parietal | 196        | 439       | Autopsy           | 94.4            | 42        | 83.4              | 3         |
| 12   | 64  | M   | Rt. Temporal | 120        | 384       | Autopsy           | 184.8           | 39        | 176.2             | 0         |
| 13   | 68  | M   | Rt. Frontal  | 179        | 610       | Salvage surgery   | 166             | 30        | 29.8              | 45        |

Recurrent pattern on MRI, PFS, and OS are listed. Vessel density (CD34-positive number/HPF) and ERG scores as assessed by immunohistochemistry are compared between initial surgery and recurrence at salvage surgery or autopsy. ERG, erythroblast transformation specific-1 related gene; F, female; FLAIR, fluid-attenuated inversion recovery; HPF, high power field; Lt, left; M, men; OS, overall survival after initial therapy; PFS, progression-free survival after initial therapy; Rt, right.

**Supplementary Table 2. Effective-refractory Bev group**

| Case | Age | Sex | Location           | Response rate to neoBev. |           | PFS (days) | OS (days) | Refractory sample | Initial surgery |           | Refractory sample |           |
|------|-----|-----|--------------------|--------------------------|-----------|------------|-----------|-------------------|-----------------|-----------|-------------------|-----------|
|      |     |     |                    | T1 Gd. (%)               | FLAIR (%) |            |           |                   | Vessel density  | ERG score | Vessel density    | ERG score |
| 1    | 77  | F   | Lt. Parietal       | -14                      | -33       | 258        | 400       | Salvage surgery   | 28.6            | 42        | 49.4              | 30        |
| 2    | 55  | M   | Rt. Frontal        | -61                      | -27       | 636        | 835       | Autopsy           | 86.4            | 16        | 48.2              | 18        |
| 3    | 68  | M   | Rt. Occipital      | -38                      | -26       | 309        | 493       | Autopsy           | 178.8           | 30        | 47.8              | 0         |
| 4    | 50  | M   | Rt. Temporal       | -26                      | -54       | 301        | 435       | Autopsy           | 75.4            | 39        | 148               | 12        |
| 5    | 78  | M   | Rt. Frontal        | -66                      | -71       | 295        | 495       | Autopsy           | 130             | 36        | 70.6              | 6         |
| 6    | 76  | M   | Rt. Frontal        | -15                      | -60       | 161        | 312       | Autopsy           | 40.4            | 36        | 48.6              | 5         |
| 7    | 63  | M   | Lt. Temporal       | -56                      | -63       | 207        | 483       | Salvage surgery   | 116             | 45        | 106.2             | 27        |
| 8    | 70  | M   | Lt. Temporal       | -42                      | -64       | 212        | 376       | Autopsy           | 98.2            | 36        | 46.8              | 6         |
| 9    | 68  | F   | Lt. Frontal, basal | -42                      | -33       | 509        | 579       | Autopsy           | 108.6           | 18        | 56.4              | 3         |
| 10   | 70  | M   | Lt. Temporal       | -35                      | -64       | 184        | 225       | Autopsy           | 61              | 24        | 71.8              | 29        |
| 11   | 80  | M   | Rt. Frontal        | -18                      | -63       | 156        | 280       | Autopsy           | 42.6            | 9         | 92                | 18        |
| 12   | 53  | M   | Lt. Parietal       | 30                       | -24       | 274        | 613       | Salvage surgery   | 110.8           | 27        | 33                | 37        |
| 13   | 69  | M   | Rt. Temporal       | -58                      | -38       | 284        | 1047      | Salvage surgery   | 77.6            | 45        | 47.6              | 24        |
| 14   | 51  | F   | Lt. Occipital      | -14                      | -75       | 188        | 295       | Salvage surgery   | 53.8            | 45        | 53                | 19        |
| 15   | 65  | F   | Lt. Frontal        | -33                      | -64       | 342        | 647       | Salvage surgery   | 99.8            | 33        | 61.8              | 7         |
| 16   | 78  | M   | Rt. Temporal       | -68                      | -25       | 259        | 344       | Salvage surgery   | 30.2            | 22        | 24.6              | 42        |

Recurrent pattern on MRI, PFS, and OS are listed. Vessel density (CD34-positive number/HPF) and ERG scores as assessed by immunohistochemistry are compared between initial surgery and recurrence at salvage surgery or autopsy. ERG, erythroblast transformation specific-1 related gene; F, female; FLAIR, fluid-attenuated inversion recovery; HPF, high power field; Lt, left; M, men; neoBev, neoadjuvant bevacizumab; OS, overall survival after initial therapy; PFS, progression-free survival after initial therapy; Rt, right.

## ERG expression before and after bevacizumab therapy

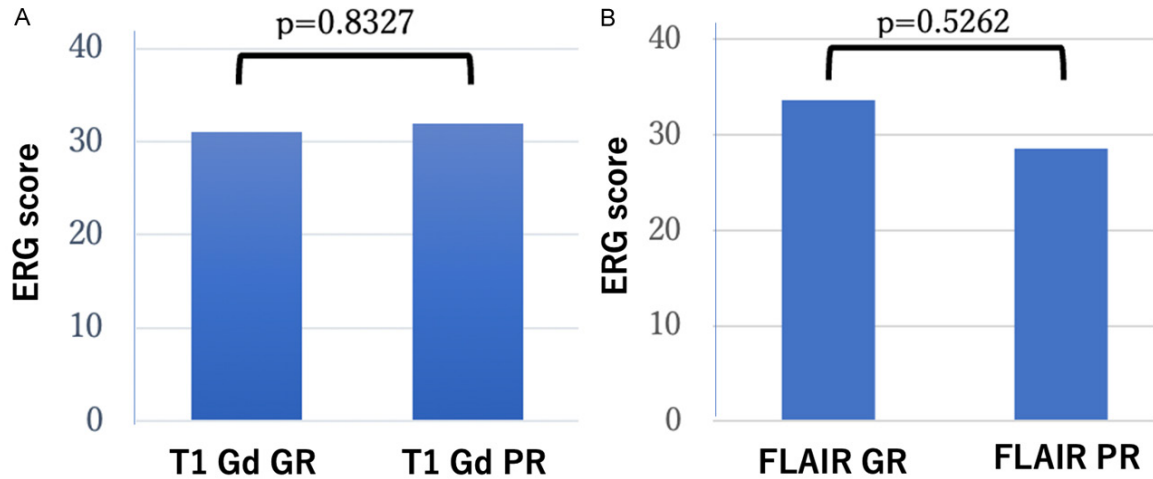

**Supplementary Figure 1.** ERG score stratified by response rate on T1-weighted imaging with gadolinium enhancement (T1 Gd) and fluid-attenuated inversion recovery (FLAIR) in neobev. Y axis shows ERG score. A. T1 Gd good responders (T1 Gd GR) and poor responders (T1 Gd PR) are defined as showing response rates of  $>35\%$  and  $\leq 35\%$ , respectively. Mann-Whitney U test,  $P=0.8327$ . B. FLAIR good responders (FLAIR GR) and poor responders (FLAIR PR) are defined as showing response rates of  $>49\%$  and  $\leq 49\%$ , respectively. Mann-Whitney U test,  $P=0.5262$ .

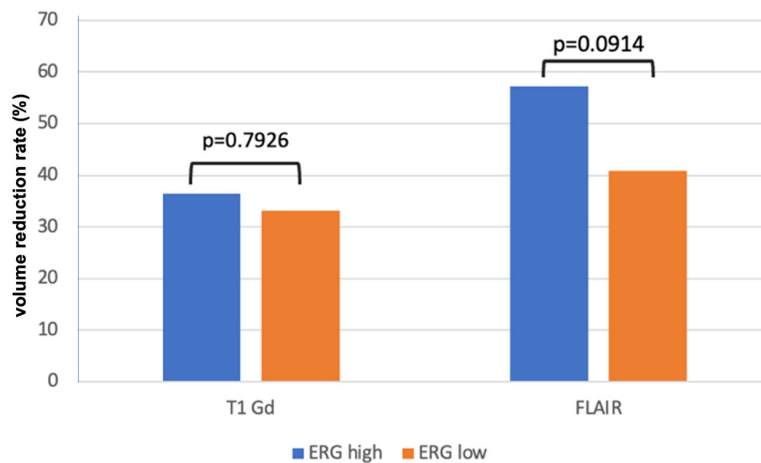

**Supplementary Figure 2.** Comparison of response rates on T1 Gd and FLAIR images after neoBev between high and low ERG score, defined as  $>36$  and  $\leq 36$ , respectively. Y axis shows the volume reduction rate on imaging. Mann-Whitney U test,  $P=0.7926$  and  $P=0.0914$  for response rates on T1 Gd and FLAIR, respectively.
